# Supplementary material
Source: Springer Nature journal article supplement (https://www.springermedizin.de/resource/supplementary/13054_2012_898_MOESM7_ESM.pdf/9709288)

|                                     | Study or Subgroup <sup>Δ</sup>                                                                              | Omega-3 |       |           | Control |       |           | Weight        | Mean Difference<br>IV, Random, 95% CI |
|-------------------------------------|-------------------------------------------------------------------------------------------------------------|---------|-------|-----------|---------|-------|-----------|---------------|---------------------------------------|
|                                     |                                                                                                             | Mean    | SD    | Total     | Mean    | SD    | Total     |               |                                       |
| <input checked="" type="checkbox"/> | <b>1.15.1 ICU patients</b>                                                                                  |         |       |           |         |       |           |               |                                       |
| <input checked="" type="checkbox"/> | Wachtler 1997                                                                                               | 0.22    | 0.13  | 19        | 0.05    | 0.03  | 21        | 8.1%          | 0.17 [0.11, 0.23]                     |
| <input checked="" type="checkbox"/> | Wichmann 2007                                                                                               | 0.1     | 0.014 | 30        | 0.035   | 0.007 | 30        | 37.8%         | 0.07 [0.06, 0.07]                     |
|                                     | <b>Subtotal (95% CI)</b>                                                                                    |         |       | <b>49</b> |         |       | <b>51</b> | <b>46.0%</b>  | <b>0.11 [0.01, 0.22]</b>              |
|                                     | Heterogeneity: Tau <sup>2</sup> = 0.01; Chi <sup>2</sup> = 11.72, df = 1 (P = 0.0006); I <sup>2</sup> = 91% |         |       |           |         |       |           |               |                                       |
|                                     | Test for overall effect: Z = 2.16 (P = 0.03)                                                                |         |       |           |         |       |           |               |                                       |
| <input checked="" type="checkbox"/> | <b>1.15.2 Not ICU patients</b>                                                                              |         |       |           |         |       |           |               |                                       |
| <input checked="" type="checkbox"/> | Grimm 2006                                                                                                  | 0.07    | 0.05  | 19        | 0.01    | 0.02  | 14        | 23.6%         | 0.06 [0.04, 0.08]                     |
| <input checked="" type="checkbox"/> | Koeller 2003                                                                                                | 0.09    | 0.03  | 14        | 0.03    | 0.01  | 16        | 30.4%         | 0.06 [0.04, 0.08]                     |
|                                     | <b>Subtotal (95% CI)</b>                                                                                    |         |       | <b>33</b> |         |       | <b>30</b> | <b>54.0%</b>  | <b>0.06 [0.05, 0.07]</b>              |
|                                     | Heterogeneity: Tau <sup>2</sup> = 0.00; Chi <sup>2</sup> = 0.00, df = 1 (P = 1.00); I <sup>2</sup> = 0%     |         |       |           |         |       |           |               |                                       |
|                                     | Test for overall effect: Z = 8.57 (P < 0.00001)                                                             |         |       |           |         |       |           |               |                                       |
|                                     | <b>Total (95% CI)</b>                                                                                       |         |       | <b>82</b> |         |       | <b>81</b> | <b>100.0%</b> | <b>0.07 [0.05, 0.09]</b>              |
|                                     | Heterogeneity: Tau <sup>2</sup> = 0.00; Chi <sup>2</sup> = 12.33, df = 3 (P = 0.006); I <sup>2</sup> = 76%  |         |       |           |         |       |           |               |                                       |
|                                     | Test for overall effect: Z = 7.24 (P < 0.00001)                                                             |         |       |           |         |       |           |               |                                       |
|                                     | Test for subgroup differences: Chi <sup>2</sup> = 1.01, df = 1 (P = 0.31), I <sup>2</sup> = 1.2%            |         |       |           |         |       |           |               |                                       |

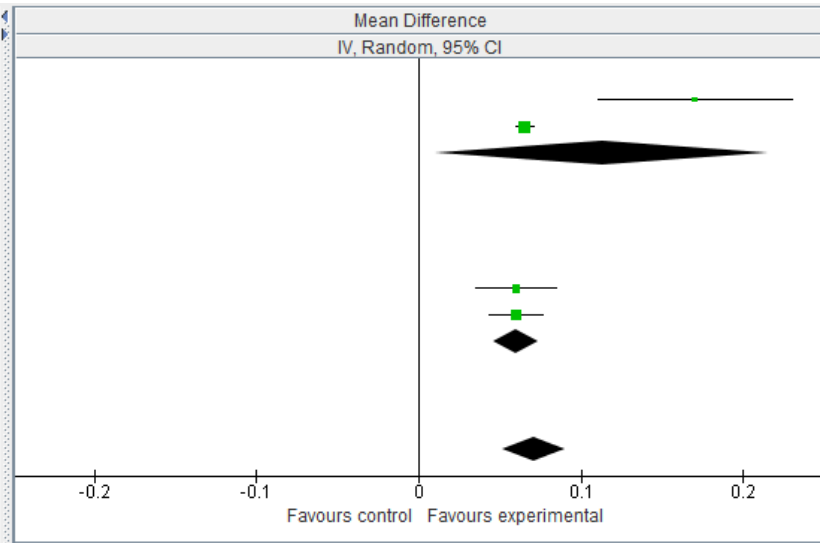

Supplement: MOESM7 [file 9709288]
